# Supplementary material for: Novel charge transfer supramolecular assemblies with Keggin anions and 2-amino-5-nitropyridine
Source: Royal Society of Chemistry journal article supplement (doi:10.1039/b508986g), 2005-11-16
Supplement: b508986g.pdf [file b508986g.pdf]

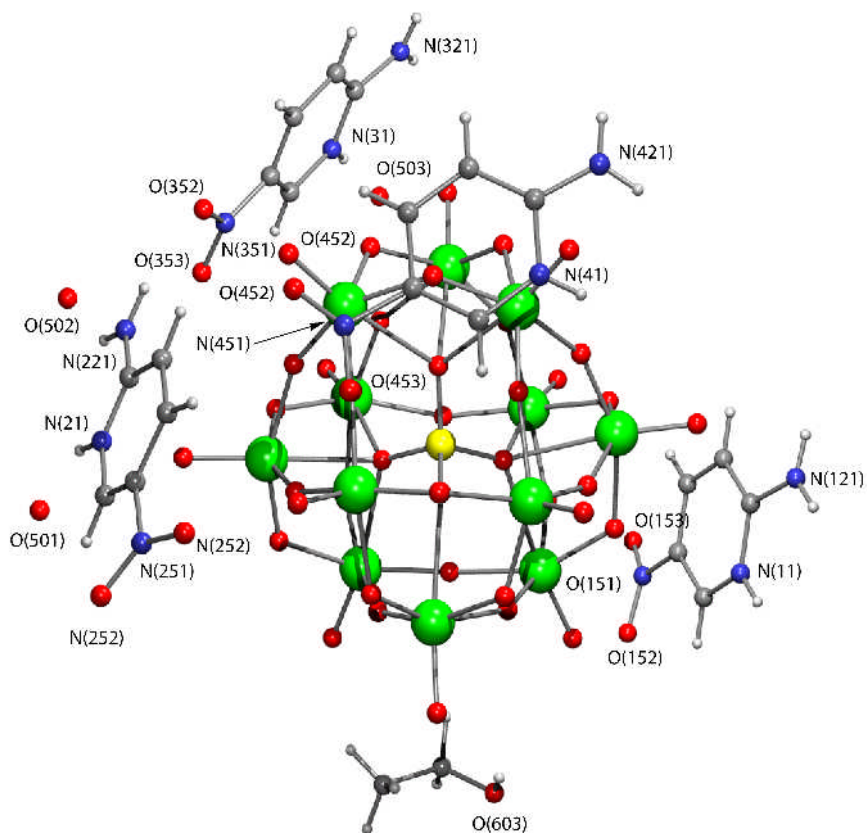

**Fig. 2.** Molecular diagram of  $(2A5NP)_4H_3[PMo_{12}O_{40}] \cdot 2.5H_2O \cdot 0.5C_2H_5OH$  (5) with the atomic notation adopted for the A5NP molecules.

a)

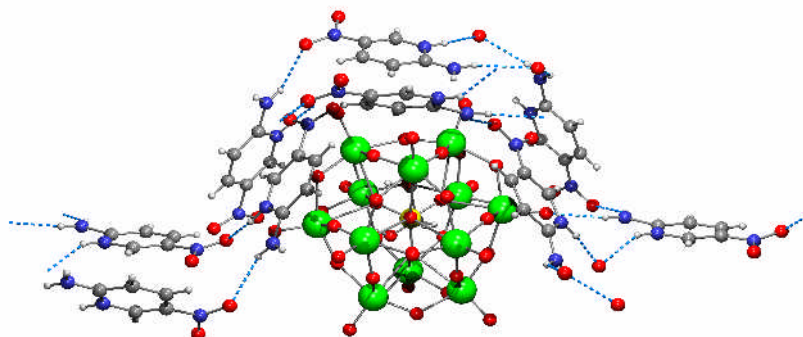

b)

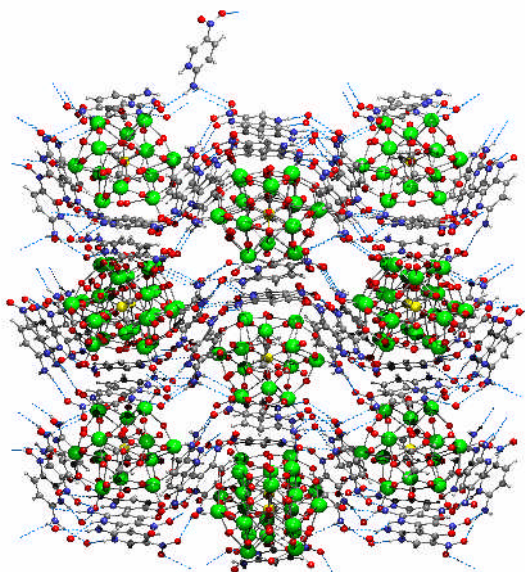

**Fig. 3.** Crystal packing of  $(2A5NP)_4H_3[PMo_{12}O_{40}] \cdot 2.5H_2O \cdot 0.5C_2H_5OH$ ; a) A view showing a Keggin anion surrounded by one-dimensional chain of hydrogen bonds composed of water and 2A5NP molecules; b) a view of crystal packing along the a crystallographic axis, showing open channels fulfilled by Keggin anions and ethanol solvent molecules
